# Supplementary material for: Genome-Wide Identification, Characterization, and Expression Analysis of the NAC Transcription Factor in Chenopodium quinoa
Source: PubMed Central journal article supplement (PMC6678211; doi:10.3390/genes10070500), 2019-06-30
Supplement: genes-10-00500-s001.pdf [file genes-10-00500-s001.pdf]

## Genome-wide identification, characterization and expression analysis of the NAC transcription factor in *Chenopodium quinoa*

Feng Li<sup>1,2</sup>, Xuhu Guo<sup>1,2</sup>, Jianxia Liu<sup>1,2</sup>, Feng Zhou<sup>1,2</sup>, Wenying Liu<sup>1,2</sup>, Juan Wu<sup>1,2</sup>, Hongli Zhang<sup>1,2</sup>, Huifen Cao<sup>1,2</sup>, Huanzhen Su<sup>1,2</sup>, Riyu Wen<sup>3\*</sup>

<sup>1</sup> College of Life Science, Shanxi Datong University, Datong 037009, People's Republic of China

<sup>2</sup> Research and Development Center of Agricultural Facility Technology, Shanxi Datong University, Datong 037009, People's Republic of China

<sup>3</sup> Maize Research Institute, Shanxi Academy of Agricultural Sciences, Xinzhou 034000, People's Republic of China

\* Corresponding author: Riyu Wen. Email: lingchenhaifeng@163.com. Telephone number: 086-0350-8622619.

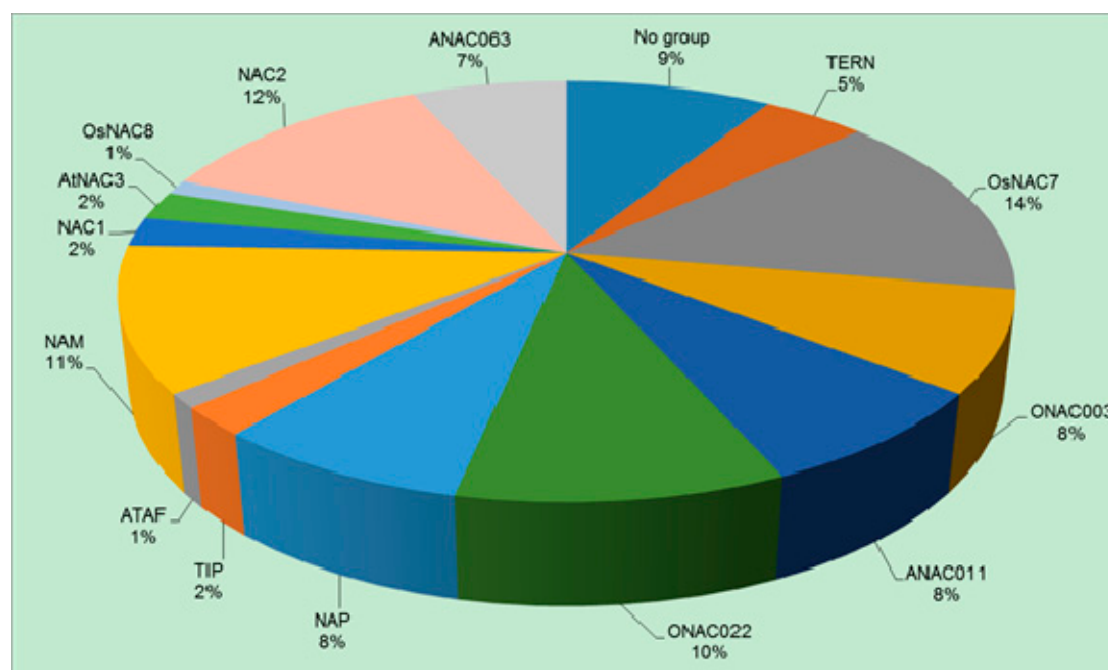

Figure S1. The percentage of members in each NAC subfamily in quinoa.

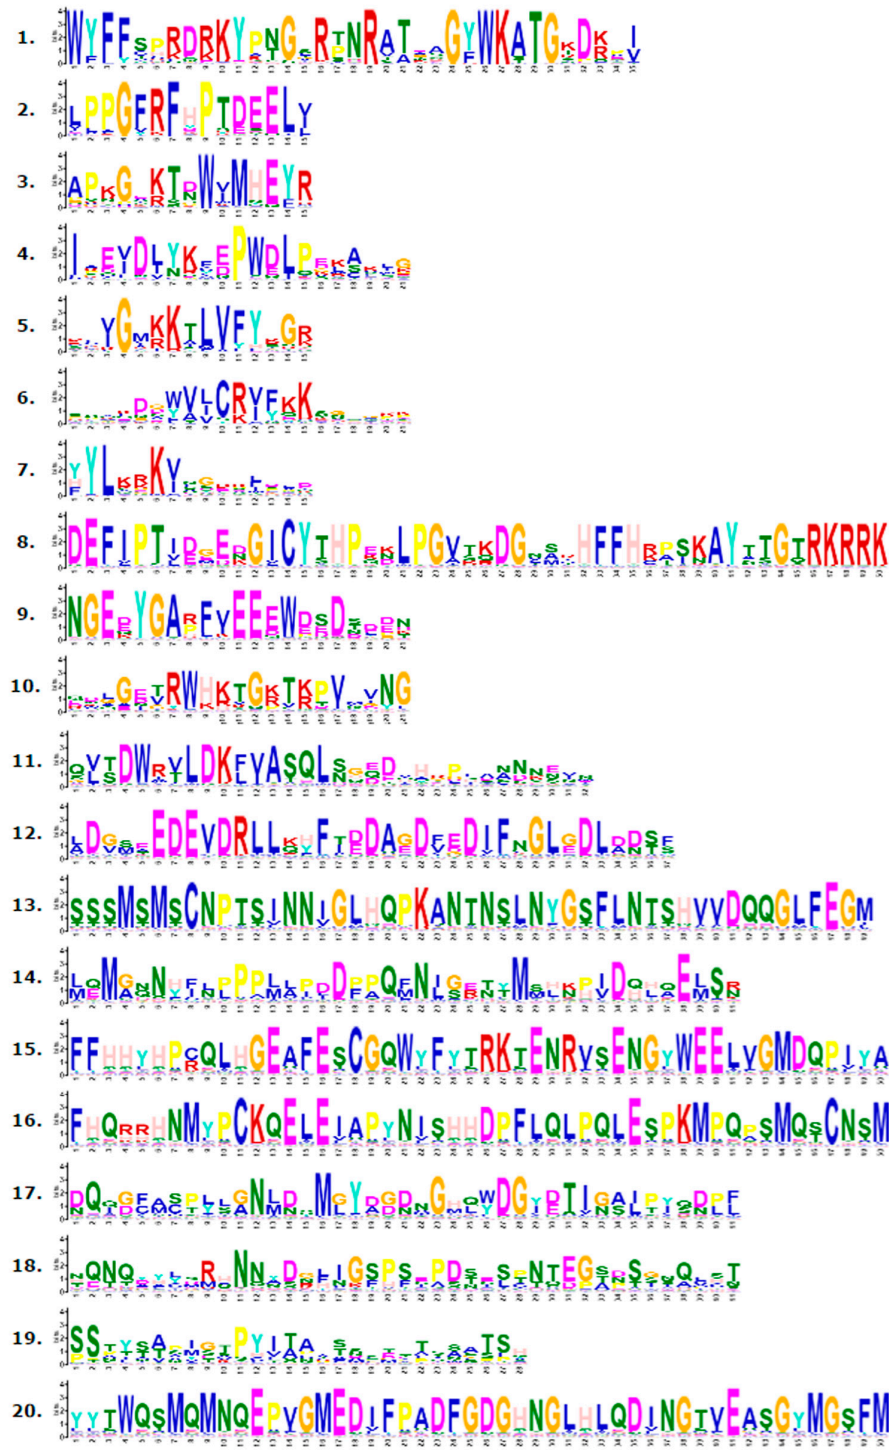

Figure S2. Multilevel consensus sequence and their logo of CqNAC proteins as predicted by MEME web server.

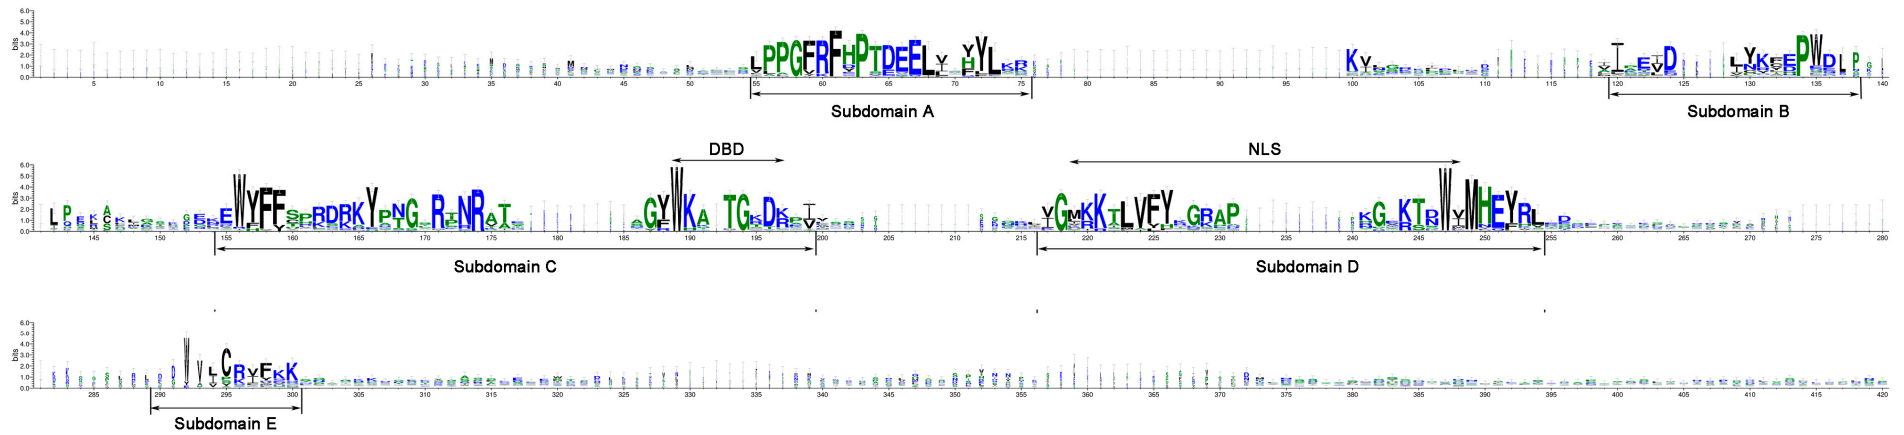

**Figure S3.** Conserved domain analysis of the CqNACs using the WebLogo program. The height of the letter designating the amino acid residue at each position represents the degree of conservation. The numbers on the x-axis represent the sequence positions in the corresponding conserved domains. The y-axis represents the information content measured in bits.

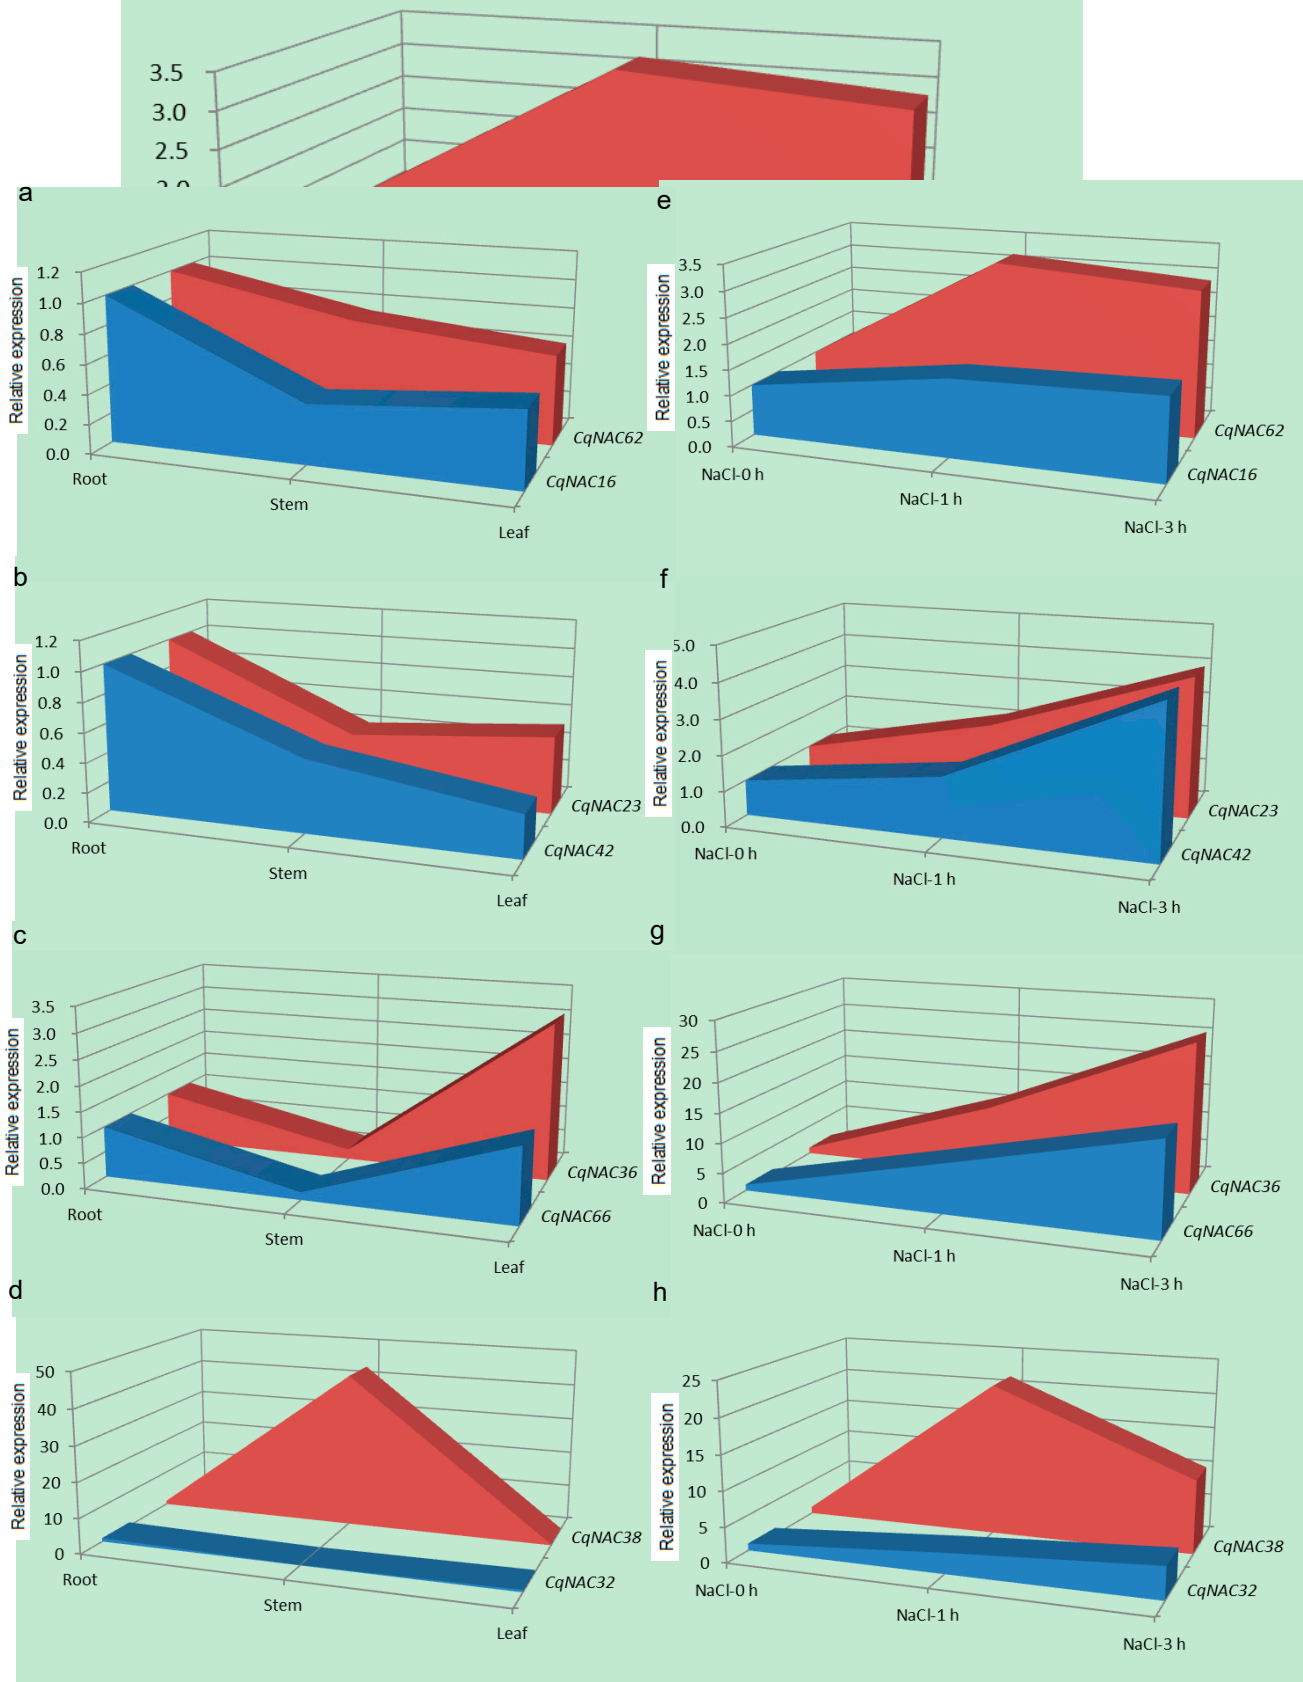

**Figure S4.** Expression patterns of some duplicated *CqNAC* genes in different organs (a–d) and in root under salt stress treatment (e–h).

Table 1. The structural analysis of CqNACs identified in this study.

| Name    | Locus name     | Protein length (AA) | $\alpha$ -helix | Extended strand | $\beta$ -turn | Random coil | Molecular weight | Theoretical pI |
|---------|----------------|---------------------|-----------------|-----------------|---------------|-------------|------------------|----------------|
| CqNAC1  | AUR62000492-RA | 327                 | 28.75%          | 12.84%          | 4.89%         | 53.52%      | 36465.01         | 5.21           |
| CqNAC2  | AUR62000493-RA | 329                 | 28.27%          | 11.85%          | 4.26%         | 55.62%      | 36054.67         | 5.15           |
| CqNAC3  | AUR62000898-RA | 418                 | 12.68%          | 29.19%          | 8.85%         | 49.28%      | 46498.08         | 6.47           |
| CqNAC4  | AUR62001365-RA | 307                 | 34.20%          | 15.64%          | 3.26%         | 46.91%      | 35908.02         | 5.42           |
| CqNAC5  | AUR62001522-RA | 268                 | 21.64%          | 16.79%          | 3.73%         | 57.84%      | 30289.73         | 8.74           |
| CqNAC6  | AUR62002191-RA | 249                 | 19.28%          | 17.67%          | 6.02%         | 57.03%      | 28433.49         | 6.07           |
| CqNAC7  | AUR62002922-RA | 339                 | 22.12%          | 17.70%          | 5.31%         | 54.87%      | 38180.40         | 4.88           |
| CqNAC8  | AUR62003400-RA | 573                 | 27.92%          | 11.52%          | 4.01%         | 56.54%      | 65093.66         | 5.67           |
| CqNAC9  | AUR62003583-RA | 224                 | 27.23%          | 16.07%          | 5.80%         | 50.89%      | 26274.26         | 5.27           |
| CqNAC10 | AUR62004554-RA | 334                 | 24.25%          | 13.47%          | 5.69%         | 56.59%      | 38417.87         | 6.47           |
| CqNAC11 | AUR62004572-RA | 388                 | 24.23%          | 15.98%          | 5.41%         | 54.38%      | 42975.83         | 5.18           |
| CqNAC12 | AUR62004648-RA | 334                 | 20.66%          | 15.27%          | 4.19%         | 59.88%      | 38928.20         | 6.34           |
| CqNAC13 | AUR62004778-RA | 576                 | 27.08%          | 11.98%          | 4.34%         | 56.60%      | 65290.07         | 5.84           |
| CqNAC14 | AUR62005772-RA | 446                 | 23.77%          | 12.11%          | 6.95%         | 57.17%      | 50303.27         | 5.27           |
| CqNAC15 | AUR62005821-RA | 288                 | 35.76%          | 11.11%          | 4.17%         | 48.96%      | 32911.82         | 5.52           |
| CqNAC16 | AUR62005966-RA | 631                 | 26.31%          | 17.12%          | 5.71%         | 50.87%      | 70214.52         | 5.11           |
| CqNAC17 | AUR62006223-RA | 276                 | 15.22%          | 18.84%          | 3.62%         | 62.32%      | 31807.15         | 8.44           |
| CqNAC18 | AUR62006407-RA | 372                 | 25.27%          | 13.17%          | 3.49%         | 58.06%      | 40436.27         | 4.64           |
| CqNAC19 | AUR62006836-RA | 315                 | 34.29%          | 15.87%          | 4.13%         | 45.71%      | 34978.40         | 4.79           |
| CqNAC20 | AUR62006837-RA | 319                 | 22.57%          | 13.79%          | 5.02%         | 58.62%      | 35107.58         | 4.97           |
| CqNAC21 | AUR62006885-RA | 329                 | 20.06%          | 11.25%          | 5.17%         | 63.53%      | 37188.40         | 8.05           |

|         |                |     |        |        |        |        |          |      |
|---------|----------------|-----|--------|--------|--------|--------|----------|------|
| CqNAC22 | AUR62007071-RA | 279 | 20.07% | 14.70% | 5.38%  | 59.86% | 32176.90 | 6.08 |
| CqNAC23 | AUR62007247-RA | 327 | 10.40% | 12.23% | 3.98%  | 73.39% | 37313.61 | 5.03 |
| CqNAC24 | AUR62007469-RA | 370 | 20.27% | 14.32% | 2.97%  | 62.43% | 42954.10 | 6.34 |
| CqNAC25 | AUR62008438-RA | 364 | 20.33% | 11.26% | 4.40%  | 64.01% | 40914.70 | 6.32 |
| CqNAC26 | AUR62010080-RA | 352 | 23.58% | 9.66%  | 4.26%  | 62.50% | 40279.01 | 5.35 |
| CqNAC27 | AUR62011638-RA | 414 | 20.53% | 18.12% | 11.59% | 49.76% | 46988.95 | 4.89 |
| CqNAC28 | AUR62011853-RA | 145 | 16.55% | 25.52% | 9.66%  | 48.28% | 16945.51 | 9.25 |
| CqNAC29 | AUR62012948-RA | 146 | 10.27% | 23.97% | 11.64% | 54.11% | 17407.86 | 9.61 |
| CqNAC30 | AUR62013074-RA | 352 | 21.59% | 9.66%  | 5.11%  | 63.64% | 40140.84 | 5.35 |
| CqNAC31 | AUR62013541-RA | 346 | 24.57% | 13.01% | 3.47%  | 58.96% | **       | **   |
| CqNAC32 | AUR62014768-RA | 343 | 9.91%  | 18.37% | 3.50%  | 68.22% | 38527.15 | 8.34 |
| CqNAC33 | AUR62014879-RA | 252 | 9.52%  | 22.22% | 8.33%  | 59.92% | 28592.20 | 8.35 |
| CqNAC34 | AUR62015520-RA | 248 | 19.76% | 20.16% | 4.44%  | 55.65% | 28310.33 | 5.91 |
| CqNAC35 | AUR62015629-RA | 302 | 20.20% | 17.22% | 3.97%  | 58.61% | 33805.23 | 9.02 |
| CqNAC36 | AUR62015630-RA | 278 | 22.66% | 15.11% | 3.96%  | 58.27% | 30847.92 | 8.97 |
| CqNAC37 | AUR62016213-RA | 389 | 20.57% | 17.48% | 10.28% | 51.67% | 44124.93 | 5.19 |
| CqNAC38 | AUR62016954-RA | 327 | 15.29% | 18.65% | 2.14%  | 63.91% | 36484.83 | 8.68 |
| CqNAC39 | AUR62017681-RA | 418 | 16.27% | 18.90% | 4.55%  | 60.29% | 46777.01 | 8.28 |
| CqNAC40 | AUR62017896-RA | 224 | 25.45% | 14.73% | 4.91%  | 54.91% | 26482.56 | 5.10 |
| CqNAC41 | AUR62018102-RA | 333 | 12.91% | 14.71% | 3.60%  | 68.77% | 38348.33 | 5.25 |
| CqNAC42 | AUR62018752-RA | 325 | 9.85%  | 12.62% | 3.08%  | 74.46% | 37194.42 | 5.41 |
| CqNAC43 | AUR62019477-RA | 400 | 15.25% | 25.75% | 7.50%  | 51.50% | **       | **   |
| CqNAC44 | AUR62019936-RA | 341 | 24.05% | 12.02% | 4.11%  | 59.82% | 39174.79 | 6.72 |
| CqNAC45 | AUR62020251-RA | 430 | 28.37% | 12.09% | 5.58%  | 53.95% | 48339.23 | 9.30 |

|         |                |     |        |        |       |        |          |      |
|---------|----------------|-----|--------|--------|-------|--------|----------|------|
| CqNAC46 | AUR62020261-RA | 258 | 20.54% | 12.40% | 3.10% | 63.95% | 29053.47 | 8.57 |
| CqNAC47 | AUR62020634-RA | 297 | 18.52% | 14.14% | 3.37% | 63.97% | 33732.06 | 8.90 |
| CqNAC48 | AUR62021621-RA | 198 | 27.27% | 20.20% | 7.58% | 44.95% | 22824.18 | 9.30 |
| CqNAC49 | AUR62021652-RA | 361 | 18.84% | 13.02% | 4.16% | 63.99% | 40521.21 | 6.32 |
| CqNAC50 | AUR62022486-RA | 386 | 32.64% | 16.32% | 4.40% | 46.63% | 43144.30 | 7.13 |
| CqNAC51 | AUR62022669-RA | 250 | 20.00% | 19.20% | 7.60% | 53.20% | 28785.28 | 8.67 |
| CqNAC52 | AUR62022685-RA | 374 | 18.72% | 17.11% | 5.08% | 59.09% | 41416.33 | 5.17 |
| CqNAC53 | AUR62022690-RA | 571 | 25.04% | 19.79% | 6.13% | 49.04% | 64944.45 | 6.49 |
| CqNAC54 | AUR62024101-RA | 248 | 25.04% | 21.37% | 8.47% | 44.76% | 28076.95 | 9.10 |
| CqNAC55 | AUR62024698-RA | 149 | 16.11% | 24.16% | 8.72% | 51.01% | 17465.06 | 9.06 |
| CqNAC56 | AUR62025580-RA | 342 | 12.87% | 25.15% | 9.36% | 52.63% | 39460.28 | 5.56 |
| CqNAC57 | AUR62025636-RA | 354 | 30.79% | 17.23% | 5.08% | 46.89% | 41347.03 | 5.22 |
| CqNAC58 | AUR62026741-RA | 283 | 19.79% | 18.37% | 4.95% | 56.89% | 32508.34 | 6.90 |
| CqNAC59 | AUR62026904-RA | 344 | 16.86% | 15.70% | 4.07% | 63.37% | 39416.95 | 6.46 |
| CqNAC60 | AUR62027152-RA | 222 | 17.57% | 22.97% | 4.95% | 54.50% | 25666.26 | 8.37 |
| CqNAC61 | AUR62027390-RA | 168 | 17.26% | 21.43% | 5.95% | 55.36% | 19591.24 | 7.02 |
| CqNAC62 | AUR62028103-RA | 630 | 28.41% | 13.17% | 2.86% | 55.56% | 70372.71 | 5.19 |
| CqNAC63 | AUR62029057-RA | 524 | 27.67% | 11.45% | 3.05% | 57.82% | 58769.41 | 4.96 |
| CqNAC64 | AUR62029330-RA | 328 | 17.99% | 16.77% | 4.27% | 60.98% | 36617.18 | 8.80 |
| CqNAC65 | AUR62029331-RA | 327 | 19.57% | 17.13% | 2.45% | 60.86% | 36697.29 | 8.23 |
| CqNAC66 | AUR62029344-RA | 298 | 17.45% | 17.45% | 4.70% | 60.40% | 33304.44 | 9.31 |
| CqNAC67 | AUR62029755-RA | 368 | 21.74% | 14.13% | 4.35% | 59.78% | 40136.91 | 4.66 |
| CqNAC68 | AUR62031086-RA | 251 | 13.55% | 19.52% | 6.37% | 60.56% | 28513.14 | 7.92 |
| CqNAC69 | AUR62031305-RA | 158 | 18.99% | 13.92% | 3.80% | 63.29% | 18487.95 | 7.06 |

|         |                |     |        |        |       |        |          |      |
|---------|----------------|-----|--------|--------|-------|--------|----------|------|
| CqNAC70 | AUR62032816-RA | 272 | 23.16% | 16.18% | 3.31% | 57.35% | 30891.77 | 8.65 |
| CqNAC71 | AUR62033276-RA | 319 | 27.59% | 16.30% | 4.70% | 51.41% | 35952.06 | 6.83 |
| CqNAC72 | AUR62033952-RA | 530 | 29.62% | 12.08% | 3.02% | 55.28% | 59469.49 | 5.05 |
| CqNAC73 | AUR62034400-RA | 385 | 20.00% | 8.05%  | 3.38% | 68.57% | 43291.89 | 8.27 |
| CqNAC74 | AUR62034435-RA | 341 | 15.54% | 14.37% | 3.52% | 66.57% | 39116.19 | 5.19 |
| CqNAC75 | AUR62035283-RA | 365 | 24.66% | 16.44% | 4.93% | 53.97% | 4101.73  | 5.02 |
| CqNAC76 | AUR62035514-RA | 153 | 16.34% | 24.84% | 5.23% | 53.59% | 17543.23 | 9.51 |
| CqNAC77 | AUR62036158-RA | 324 | 16.05% | 19.75% | 5.25% | 58.95% | 35672.96 | 8.15 |
| CqNAC78 | AUR62036626-RA | 279 | 24.73% | 18.28% | 3.94% | 53.05% | 31455.38 | 6.51 |
| CqNAC79 | AUR62036991-RA | 151 | 14.57% | 20.53% | 4.64% | 60.26% | 17509.63 | 8.64 |
| CqNAC80 | AUR62037478-RA | 241 | 16.18% | 20.75% | 7.05% | 56.02% | 27617.77 | 5.43 |
| CqNAC81 | AUR62038748-RA | 294 | 14.29% | 10.88% | 3.74% | 71.09% | 33605.95 | 8.75 |
| CqNAC82 | AUR62039815-RA | 385 | 20.26% | 6.23%  | 3.38% | 70.13% | 43123.80 | 8.28 |
| CqNAC83 | AUR62039927-RA | 370 | 25.41% | 13.24% | 2.43% | 58.92% | 42952.16 | 6.24 |
| CqNAC84 | AUR62040120-RA | 390 | 24.10% | 15.13% | 7.44% | 53.33% | 43352.17 | 9.15 |
| CqNAC85 | AUR62040889-RA | 213 | 26.76% | 20.19% | 5.16% | 47.89% | 24342.91 | 9.15 |
| CqNAC86 | AUR62041525-RA | 550 | 20.91% | 17.27% | 5.64% | 56.18% | 61100.19 | 4.60 |
| CqNAC87 | AUR62041539-RA | 556 | 23.20% | 16.37% | 5.40% | 55.04% | 61749.78 | 4.60 |
| CqNAC88 | AUR62043491-RA | 393 | 29.52% | 9.67%  | 5.09% | 55.73% | 43868.48 | 5.37 |
| CqNAC89 | AUR62043497-RA | 155 | 10.32% | 29.68% | 4.52% | 55.48% | 17813.61 | 9.51 |
| CqNAC90 | AUR62044373-RA | 454 | 25.77% | 11.23% | 3.96% | 59.03% | 51258.61 | 5.15 |



Table S2: The classification and gene structures of *NACs* in quinoa.

| Name           | Subfamily | Extron number | Intron number |
|----------------|-----------|---------------|---------------|
| <i>CqNAC1</i>  | NAC2      | 2             | 1             |
| <i>CqNAC2</i>  | NAC2      | 1             | 0             |
| <i>CqNAC3</i>  | ANAC063   | 3             | 2             |
| <i>CqNAC4</i>  | ANAC063   | 3             | 2             |
| <i>CqNAC5</i>  | TERN      | 4             | 3             |
| <i>CqNAC6</i>  | OsNAC7    | 4             | 3             |
| <i>CqNAC7</i>  | ONAC003   | 5             | 4             |
| <i>CqNAC8</i>  | ANAC011   | 6             | 5             |
| <i>CqNAC9</i>  | No group  | 3             | 2             |
| <i>CqNAC10</i> | OsNAC7    | 2             | 1             |
| <i>CqNAC11</i> | ONAC003   | 5             | 4             |
| <i>CqNAC12</i> | OsNAC7    | 3             | 2             |
| <i>CqNAC13</i> | ANAC011   | 6             | 5             |
| <i>CqNAC14</i> | ONAC022   | 3             | 2             |
| <i>CqNAC15</i> | NAP       | 5             | 4             |
| <i>CqNAC16</i> | TIP       | 5             | 4             |
| <i>CqNAC17</i> | TERN      | 3             | 2             |
| <i>CqNAC18</i> | NAC2      | 1             | 0             |
| <i>CqNAC19</i> | NAC2      | 2             | 1             |
| <i>CqNAC20</i> | NAC2      | 2             | 1             |
| <i>CqNAC21</i> | ATAF      | 4             | 3             |
| <i>CqNAC22</i> | OsNAC7    | 3             | 2             |
| <i>CqNAC23</i> | ANAC011   | 4             | 3             |
| <i>CqNAC24</i> | OsNAC7    | 3             | 2             |
| <i>CqNAC25</i> | NAM       | 3             | 2             |
| <i>CqNAC26</i> | ANAC011   | 4             | 3             |
| <i>CqNAC27</i> | ANAC063   | 3             | 2             |
| <i>CqNAC28</i> | NAC1      | 2             | 1             |
| <i>CqNAC29</i> | ONAC022   | 2             | 1             |
| <i>CqNAC30</i> | ANAC011   | 4             | 3             |
| <i>CqNAC31</i> | OsNAC7    | 3             | 2             |
| <i>CqNAC32</i> | NAP       | 3             | 2             |
| <i>CqNAC33</i> | ONAC003   | 2             | 1             |
| <i>CqNAC34</i> | OsNAC7    | 4             | 3             |
| <i>CqNAC35</i> | NAP       | 3             | 2             |
| <i>CqNAC36</i> | AtNAC3    | 4             | 3             |
| <i>CqNAC37</i> | ANAC063   | 3             | 2             |

|                |          |   |   |
|----------------|----------|---|---|
| <i>CqNAC38</i> | NAP      | 3 | 2 |
| <i>CqNAC39</i> | OsNAC7   | 4 | 3 |
| <i>CqNAC40</i> | No group | 3 | 2 |
| <i>CqNAC41</i> | NAM      | 3 | 2 |
| <i>CqNAC42</i> | ANAC011  | 4 | 3 |
| <i>CqNAC43</i> | NAM      | 3 | 2 |
| <i>CqNAC44</i> | OsNAC7   | 3 | 2 |
| <i>CqNAC45</i> | OsNAC8   | 5 | 4 |
| <i>CqNAC46</i> | TERN     | 3 | 2 |
| <i>CqNAC47</i> | NAM      | 4 | 3 |
| <i>CqNAC48</i> | NAM      | 4 | 3 |
| <i>CqNAC49</i> | NAM      | 3 | 2 |
| <i>CqNAC50</i> | No group | 6 | 5 |
| <i>CqNAC51</i> | OsNAC7   | 3 | 2 |
| <i>CqNAC52</i> | ONAC003  | 5 | 4 |
| <i>CqNAC53</i> | OsNAC7   | 5 | 4 |
| <i>CqNAC54</i> | NAM      | 4 | 3 |
| <i>CqNAC55</i> | NAC1     | 3 | 2 |
| <i>CqNAC56</i> | ANAC063  | 3 | 2 |
| <i>CqNAC57</i> | ANAC063  | 3 | 2 |
| <i>CqNAC58</i> | OsNAC7   | 4 | 3 |
| <i>CqNAC59</i> | ONAC022  | 3 | 2 |
| <i>CqNAC60</i> | ONAC022  | 3 | 2 |
| <i>CqNAC61</i> | No group | 2 | 1 |
| <i>CqNAC62</i> | TIP      | 5 | 4 |
| <i>CqNAC63</i> | NAC2     | 4 | 3 |
| <i>CqNAC64</i> | NAP      | 4 | 3 |
| <i>CqNAC65</i> | NAP      | 4 | 3 |
| <i>CqNAC66</i> | AtNAC3   | 4 | 3 |
| <i>CqNAC67</i> | NAC2     | 1 | 0 |
| <i>CqNAC68</i> | ONAC003  | 2 | 1 |
| <i>CqNAC69</i> | No group | 2 | 1 |
| <i>CqNAC70</i> | NAP      | 3 | 2 |
| <i>CqNAC71</i> | ONAC003  | 5 | 4 |
| <i>CqNAC72</i> | NAC2     | 5 | 4 |
| <i>CqNAC73</i> | ONAC022  | 3 | 2 |
| <i>CqNAC74</i> | NAM      | 3 | 2 |
| <i>CqNAC75</i> | ONAC003  | 6 | 5 |
| <i>CqNAC76</i> | No group | 2 | 1 |
| <i>CqNAC77</i> | NAM      | 5 | 4 |

|                |          |   |   |
|----------------|----------|---|---|
| <i>CqNAC78</i> | No group | 3 | 2 |
| <i>CqNAC79</i> | TERN     | 2 | 1 |
| <i>CqNAC80</i> | ANAC011  | 3 | 2 |
| <i>CqNAC81</i> | NAM      | 4 | 3 |
| <i>CqNAC82</i> | ONAC022  | 3 | 2 |
| <i>CqNAC83</i> | OsNAC7   | 3 | 2 |
| <i>CqNAC84</i> | ONAC022  | 5 | 4 |
| <i>CqNAC85</i> | ONAC022  | 3 | 2 |
| <i>CqNAC86</i> | NAC2     | 6 | 5 |
| <i>CqNAC87</i> | NAC2     | 6 | 5 |
| <i>CqNAC88</i> | NAC2     | 4 | 3 |
| <i>CqNAC89</i> | No group | 2 | 1 |
| <i>CqNAC90</i> | ONAC022  | 3 | 2 |

---

Table S3: Subcellular localization of NAC proteins in quinoa.

| Name    | PSORT result        | Cello result        |
|---------|---------------------|---------------------|
| CqNAC1  | Nuclear protein     | Nuclear protein     |
| CqNAC2  | Nuclear protein     | Chloroplast protein |
| CqNAC3  | Nuclear protein     | Nuclear protein     |
| CqNAC4  | Nuclear protein     | Nuclear protein     |
| CqNAC5  | Nuclear protein     | Nuclear protein     |
| CqNAC6  | Peroxisomal protein | Nuclear protein     |
| CqNAC7  | Nuclear protein     | Nuclear protein     |
| CqNAC8  | Nuclear protein     | Nuclear protein     |
| CqNAC9  | Nuclear protein     | Nuclear protein     |
| CqNAC10 | Nuclear protein     | Nuclear protein     |
| CqNAC11 | Nuclear protein     | Nuclear protein     |
| CqNAC12 | Nuclear protein     | Nuclear protein     |
| CqNAC13 | Nuclear protein     | Nuclear protein     |
| CqNAC14 | Nuclear protein     | Nuclear protein     |
| CqNAC15 | Nuclear protein     | Nuclear protein     |
| CqNAC16 | Nuclear protein     | Nuclear protein     |
| CqNAC17 | Nuclear protein     | Nuclear protein     |
| CqNAC18 | Nuclear protein     | Nuclear protein     |
| CqNAC19 | Nuclear protein     | Nuclear protein     |
| CqNAC20 | Nuclear protein     | Nuclear protein     |
| CqNAC21 | Chloroplast protein | Nuclear protein     |
| CqNAC22 | Peroxisomal protein | Nuclear protein     |
| CqNAC23 | Nuclear protein     | Nuclear protein     |
| CqNAC24 | Nuclear protein     | Nuclear protein     |
| CqNAC25 | Nuclear protein     | Nuclear protein     |
| CqNAC26 | Chloroplast protein | Nuclear protein     |
| CqNAC27 | Nuclear protein     | Nuclear protein     |
| CqNAC28 | Peroxisomal protein | Cytoplasmic protein |
| CqNAC29 | Nuclear protein     | Cytoplasmic protein |
| CqNAC30 | Nuclear protein     | Nuclear protein     |
| CqNAC31 | Peroxisomal protein | Nuclear protein     |
| CqNAC32 | Nuclear protein     | Nuclear protein     |
| CqNAC33 | Nuclear protein     | Nuclear protein     |
| CqNAC34 | Peroxisomal protein | Nuclear protein     |
| CqNAC35 | Nuclear protein     | Nuclear protein     |
| CqNAC36 | Nuclear protein     | Nuclear protein     |
| CqNAC37 | Nuclear protein     | Nuclear protein     |
| CqNAC38 | Nuclear protein     | Nuclear protein     |
| CqNAC39 | Nuclear protein     | Nuclear protein     |
| CqNAC40 | Nuclear protein     | Nuclear protein     |

|         |                       |                        |
|---------|-----------------------|------------------------|
| CqNAC41 | Nuclear protein       | Cytoplasmic protein    |
| CqNAC42 | Nuclear protein       | Nuclear protein        |
| CqNAC43 | Nuclear protein       | Nuclear protein        |
| CqNAC44 | Nuclear protein       | Nuclear protein        |
| CqNAC45 | Nuclear protein       | Nuclear protein        |
| CqNAC46 | Peroxisomal protein   | Nuclear protein        |
| CqNAC47 | Nuclear protein       | Nuclear protein        |
| CqNAC48 | Cytoplasmic protein   | Cytoplasmic protein    |
| CqNAC49 | Nuclear protein       | Nuclear protein        |
| CqNAC50 | Nuclear protein       | PlasmaMembrane protein |
| CqNAC51 | Nuclear protein       | Nuclear protein        |
| CqNAC52 | Nuclear protein       | Nuclear protein        |
| CqNAC53 | Extracellular protein | Nuclear protein        |
| CqNAC54 | Nuclear protein       | Cytoplasmic protein    |
| CqNAC55 | Peroxisomal protein   | Cytoplasmic protein    |
| CqNAC56 | Cytoplasmic protein   | Nuclear protein        |
| CqNAC57 | Nuclear protein       | Nuclear protein        |
| CqNAC58 | Peroxisomal protein   | Nuclear protein        |
| CqNAC59 | Nuclear protein       | Nuclear protein        |
| CqNAC60 | Cytoplasmic protein   | Nuclear protein        |
| CqNAC61 | Nuclear protein       | Nuclear protein        |
| CqNAC62 | Cytoplasmic protein   | Nuclear protein        |
| CqNAC63 | Goloi protein         | Nuclear protein        |
| CqNAC64 | Nuclear protein       | Nuclear protein        |
| CqNAC65 | Nuclear protein       | Nuclear protein        |
| CqNAC66 | Nuclear protein       | Nuclear protein        |
| CqNAC67 | Cytoplasmic protein   | Chloroplast protein    |
| CqNAC68 | Nuclear protein       | Nuclear protein        |
| CqNAC69 | Nuclear protein       | Nuclear protein        |
| CqNAC70 | Nuclear protein       | Nuclear protein        |
| CqNAC71 | Nuclear protein       | Nuclear protein        |
| CqNAC72 | Goloi protein         | Nuclear protein        |
| CqNAC73 | Nuclear protein       | Nuclear protein        |
| CqNAC74 | Nuclear protein       | Cytoplasmic protein    |
| CqNAC75 | Nuclear protein       | Nuclear protein        |
| CqNAC76 | Nuclear protein       | Cytoplasmic protein    |
| CqNAC77 | Nuclear protein       | Nuclear protein        |
| CqNAC78 | Chloroplast protein   | Nuclear protein        |
| CqNAC79 | Nuclear protein       | Nuclear protein        |
| CqNAC80 | Nuclear protein       | Nuclear protein        |
| CqNAC81 | Nuclear protein       | Nuclear protein        |
| CqNAC82 | Nuclear protein       | Nuclear protein        |

|         |                     |                     |
|---------|---------------------|---------------------|
| CqNAC83 | Nuclear protein     | Nuclear protein     |
| CqNAC84 | Nuclear protein     | Nuclear protein     |
| CqNAC85 | Cytoplasmic protein | Nuclear protein     |
| CqNAC86 | Chloroplast protein | Cytoplasmic protein |
| CqNAC87 | Chloroplast protein | Vacuole protein     |
| CqNAC88 | Chloroplast protein | Nuclear protein     |
| CqNAC89 | Nuclear protein     | Cytoplasmic protein |
| CqNAC90 | Nuclear protein     | Nuclear protein     |

---

Table S4: Genomic location of NACs in quinoa.

| Name           | Chromosome Name        | Gene Start (bp) | Gene End (bp) |
|----------------|------------------------|-----------------|---------------|
| <i>CqNAC1</i>  | C_Quinoa_Scaffold_2088 | 5104189         | 5105235       |
| <i>CqNAC2</i>  | C_Quinoa_Scaffold_2088 | 5126097         | 5127086       |
| <i>CqNAC3</i>  | C_Quinoa_Scaffold_2088 | 10436292        | 10439135      |
| <i>CqNAC4</i>  | C_Quinoa_Scaffold_2716 | 3667151         | 3670126       |
| <i>CqNAC5</i>  | C_Quinoa_Scaffold_2716 | 5750306         | 5754005       |
| <i>CqNAC6</i>  | C_Quinoa_Scaffold_4480 | 3338123         | 3340057       |
| <i>CqNAC7</i>  | C_Quinoa_Scaffold_1000 | 16136114        | 16139389      |
| <i>CqNAC8</i>  | C_Quinoa_Scaffold_2370 | 206197          | 210326        |
| <i>CqNAC9</i>  | C_Quinoa_Scaffold_2370 | 2346420         | 2348358       |
| <i>CqNAC10</i> | C_Quinoa_Scaffold_4250 | 4675233         | 4677254       |
| <i>CqNAC11</i> | C_Quinoa_Scaffold_4250 | 4929761         | 4932822       |
| <i>CqNAC12</i> | C_Quinoa_Scaffold_4250 | 5835845         | 5837591       |
| <i>CqNAC13</i> | C_Quinoa_Scaffold_3820 | 2201216         | 2205271       |
| <i>CqNAC14</i> | C_Quinoa_Scaffold_1214 | 7730160         | 7733025       |
| <i>CqNAC15</i> | C_Quinoa_Scaffold_1214 | 8710235         | 8716062       |
| <i>CqNAC16</i> | C_Quinoa_Scaffold_1001 | 780823          | 785367        |
| <i>CqNAC17</i> | C_Quinoa_Scaffold_1001 | 4184394         | 4188756       |
| <i>CqNAC18</i> | C_Quinoa_Scaffold_1001 | 7434695         | 7435813       |
| <i>CqNAC19</i> | C_Quinoa_Scaffold_3429 | 5501991         | 5503001       |
| <i>CqNAC20</i> | C_Quinoa_Scaffold_3429 | 5506671         | 5507714       |
| <i>CqNAC21</i> | C_Quinoa_Scaffold_3429 | 6081924         | 6086002       |
| <i>CqNAC22</i> | C_Quinoa_Scaffold_1971 | 870150          | 871578        |
| <i>CqNAC23</i> | C_Quinoa_Scaffold_1971 | 3145691         | 3147716       |
| <i>CqNAC24</i> | C_Quinoa_Scaffold_1971 | 5582799         | 5584443       |
| <i>CqNAC25</i> | C_Quinoa_Scaffold_3422 | 4681091         | 4683124       |
| <i>CqNAC26</i> | C_Quinoa_Scaffold_1257 | 1424158         | 1428569       |
| <i>CqNAC27</i> | C_Quinoa_Scaffold_3333 | 4561449         | 4562989       |
| <i>CqNAC28</i> | C_Quinoa_Scaffold_2008 | 1858490         | 1862276       |
| <i>CqNAC29</i> | C_Quinoa_Scaffold_1040 | 720134          | 720757        |
| <i>CqNAC30</i> | C_Quinoa_Scaffold_1040 | 1973115         | 1977583       |
| <i>CqNAC31</i> | C_Quinoa_Scaffold_1611 | 4650646         | 4653648       |
| <i>CqNAC32</i> | C_Quinoa_Scaffold_2947 | 2498542         | 2500028       |
| <i>CqNAC33</i> | C_Quinoa_Scaffold_2947 | 4419915         | 4428541       |
| <i>CqNAC34</i> | C_Quinoa_Scaffold_2751 | 7542231         | 7544163       |
| <i>CqNAC35</i> | C_Quinoa_Scaffold_1529 | 902046          | 903275        |
| <i>CqNAC36</i> | C_Quinoa_Scaffold_1529 | 916768          | 917919        |
| <i>CqNAC37</i> | C_Quinoa_Scaffold_3256 | 2959547         | 2961121       |
| <i>CqNAC38</i> | C_Quinoa_Scaffold_3787 | 1019205         | 1020764       |

|                |                        |         |         |
|----------------|------------------------|---------|---------|
| <i>CqNAC39</i> | C_Quinoa_Scaffold_3458 | 2937169 | 2943353 |
| <i>CqNAC40</i> | C_Quinoa_Scaffold_3086 | 1470978 | 1472880 |
| <i>CqNAC41</i> | C_Quinoa_Scaffold_2048 | 3674508 | 3675854 |
| <i>CqNAC42</i> | C_Quinoa_Scaffold_1817 | 1668340 | 1670371 |
| <i>CqNAC43</i> | C_Quinoa_Scaffold_2127 | 1427472 | 1429718 |
| <i>CqNAC44</i> | C_Quinoa_Scaffold_1480 | 2644016 | 2645684 |
| <i>CqNAC45</i> | C_Quinoa_Scaffold_2465 | 2584216 | 2586669 |
| <i>CqNAC46</i> | C_Quinoa_Scaffold_2465 | 2723997 | 2725875 |
| <i>CqNAC47</i> | C_Quinoa_Scaffold_3966 | 1391082 | 1397450 |
| <i>CqNAC48</i> | C_Quinoa_Scaffold_1675 | 1474377 | 1481074 |
| <i>CqNAC49</i> | C_Quinoa_Scaffold_1675 | 1933365 | 1935019 |
| <i>CqNAC50</i> | C_Quinoa_Scaffold_3163 | 7127974 | 7137645 |
| <i>CqNAC51</i> | C_Quinoa_Scaffold_1870 | 1636666 | 1638400 |
| <i>CqNAC52</i> | C_Quinoa_Scaffold_1870 | 1836151 | 1839245 |
| <i>CqNAC53</i> | C_Quinoa_Scaffold_1870 | 1883018 | 1891940 |
| <i>CqNAC54</i> | C_Quinoa_Scaffold_4119 | 171296  | 172432  |
| <i>CqNAC55</i> | C_Quinoa_Scaffold_1992 | 1842893 | 1846940 |
| <i>CqNAC56</i> | C_Quinoa_Scaffold_1677 | 29928   | 31688   |
| <i>CqNAC57</i> | C_Quinoa_Scaffold_1677 | 723492  | 725417  |
| <i>CqNAC58</i> | C_Quinoa_Scaffold_2081 | 4392587 | 4400244 |
| <i>CqNAC59</i> | C_Quinoa_Scaffold_2185 | 2906263 | 2914672 |
| <i>CqNAC60</i> | C_Quinoa_Scaffold_2314 | 1809369 | 1810776 |
| <i>CqNAC61</i> | C_Quinoa_Scaffold_4446 | 2447430 | 2449183 |
| <i>CqNAC62</i> | C_Quinoa_Scaffold_2933 | 546240  | 550841  |
| <i>CqNAC63</i> | C_Quinoa_Scaffold_2412 | 3029866 | 3035495 |
| <i>CqNAC64</i> | C_Quinoa_Scaffold_2939 | 1713207 | 1715584 |
| <i>CqNAC65</i> | C_Quinoa_Scaffold_2939 | 1736295 | 1738669 |
| <i>CqNAC66</i> | C_Quinoa_Scaffold_2939 | 1941693 | 1943007 |
| <i>CqNAC67</i> | C_Quinoa_Scaffold_2858 | 1227921 | 1229027 |
| <i>CqNAC68</i> | C_Quinoa_Scaffold_1829 | 406399  | 409549  |
| <i>CqNAC69</i> | C_Quinoa_Scaffold_4413 | 2894460 | 2896172 |
| <i>CqNAC70</i> | C_Quinoa_Scaffold_3751 | 595767  | 597199  |
| <i>CqNAC71</i> | C_Quinoa_Scaffold_2896 | 1183564 | 1190468 |
| <i>CqNAC72</i> | C_Quinoa_Scaffold_4191 | 561057  | 566172  |
| <i>CqNAC73</i> | C_Quinoa_Scaffold_2742 | 830479  | 831969  |
| <i>CqNAC74</i> | C_Quinoa_Scaffold_2742 | 2425950 | 2427349 |
| <i>CqNAC75</i> | C_Quinoa_Scaffold_2868 | 2813158 | 2817413 |
| <i>CqNAC76</i> | C_Quinoa_Scaffold_1186 | 6601758 | 6605376 |
| <i>CqNAC77</i> | C_Quinoa_Scaffold_2702 | 2127273 | 2129646 |
| <i>CqNAC78</i> | C_Quinoa_Scaffold_3901 | 1027330 | 1037429 |



|                |                        |         |         |
|----------------|------------------------|---------|---------|
| <i>CqNAC79</i> | C_Quinoa_Scaffold_1847 | 379048  | 380885  |
| <i>CqNAC80</i> | C_Quinoa_Scaffold_4036 | 284851  | 288100  |
| <i>CqNAC81</i> | C_Quinoa_Scaffold_3144 | 508634  | 514678  |
| <i>CqNAC82</i> | C_Quinoa_Scaffold_1828 | 2728236 | 2729766 |
| <i>CqNAC83</i> | C_Quinoa_Scaffold_3651 | 230705  | 236209  |
| <i>CqNAC84</i> | C_Quinoa_Scaffold_2690 | 869497  | 871434  |
| <i>CqNAC85</i> | C_Quinoa_Scaffold_2272 | 2995932 | 3001176 |
| <i>CqNAC86</i> | C_Quinoa_Scaffold_1660 | 1227409 | 1230573 |
| <i>CqNAC87</i> | C_Quinoa_Scaffold_3313 | 554469  | 558083  |
| <i>CqNAC88</i> | C_Quinoa_Scaffold_2828 | 440003  | 448032  |
| <i>CqNAC89</i> | C_Quinoa_Scaffold_2828 | 1153363 | 1157531 |
| <i>CqNAC90</i> | C_Quinoa_Scaffold_2741 | 24164   | 26939   |

---

Table S5: PCR primers used for qRT-PCR in this study.

| Gene name      | Forward primer (5'-3') | Reverse primer (5'-3')     |
|----------------|------------------------|----------------------------|
| <i>Actin</i>   | GGTATTGGAACGGTGCCAGT   | GGACTCGTGGTGCATCTCAA       |
| <i>CqNAC16</i> | AAGGAGAGTGGATCATGTAGCG | CCTTGTAGCCCTCTGGTTCA       |
| <i>CqNAC21</i> | ACACGTGTCTAGGCTGCGGT   | GAAGCACATTCCAAAAGCGG       |
| <i>CqNAC23</i> | GGCAACTGATTACATCCCACAA | GCCAATTTGATTAAGATCATCAACAT |
| <i>CqNAC32</i> | TTACCCTCAGCTACCTCCCG   | TCGACCTCAGCTATGATCGC       |
| <i>CqNAC36</i> | TGACCGTTCATTCGCTTTGC   | ATTCAGGTGCCGCGGTTAAC       |
| <i>CqNAC38</i> | TTTCGCTTCCATCCGACTGA   | CTCCAAATATCGCCTCGGCT       |
| <i>CqNAC42</i> | ACTGATTACATCCCACAATG   | TTAAGATCATGTTCAATCTCG      |
| <i>CqNAC45</i> | ATTGAGCAGAGCAGAGGAGA   | CGAGGTGAGAAGAAAAACCA       |
| <i>CqNAC62</i> | CATGTGGAAGAATTCATCTG   | AGCTAACGGGTAATTCTGAT       |
| <i>CqNAC66</i> | GAGTGCGGCAAAGCCTACAA   | ACCCGGTAAAGGCGAATTCA       |
| <i>CqNAC85</i> | GGAGGTGTCATCGACGATCA   | GGACGTCGCTTCTCAACCTT       |

Table S6: Orthology information of CqNACs and AtNACs from BLASTP.

| CqNAC Name | AtNAC Name        | Max Score | Total Score | Query Cover | E-Value   | Per.ident |
|------------|-------------------|-----------|-------------|-------------|-----------|-----------|
| CqNAC36    | RD26/AT4G27410    | 372       | 372         | 0.86        | 2.00E-130 | 75.20%    |
| CqNAC66    | RD26/AT4G27410    | 325       | 325         | 0.69        | 2.00E-111 | 65.20%    |
| CqNAC36    | ANAC019/AT1G52890 | 342       | 342         | 0.83        | 7.00E-118 | 67.20%    |
| CqNAC66    | ANAC019/AT1G52890 | 323       | 323         | 0.56        | 3.00E-110 | 85.71%    |
| CqNAC32    | ANAC2/AT3G15510   | 300       | 300         | 0.58        | 7.00E-100 | 74.26%    |
| CqNAC38    | ANAC2/AT3G15510   | 263       | 263         | 0.66        | 2.00E-85  | 61.80%    |
| CqNAC23    | NAC096/AT5G46590  | 283       | 283         | 0.79        | 1.00E-94  | 54.55%    |
| CqNAC42    | NAC096/AT5G46590  | 279       | 279         | 0.79        | 6.00E-93  | 54.55%    |
| CqNAC21    | ATAF1/AT1G01720   | 226       | 226         | 0.73        | 4.00E-73  | 52.21%    |
| CqNAC16    | NTL6/AT3G49530    | 247       | 283         | 0.52        | 3.00E-74  | 51.10%    |
| CqNAC62    | NTL6/AT3G49530    | 244       | 276         | 0.47        | 2.00E-73  | 57.51%    |
| CqNAC45    | NTL8/AT2G27300    | 224       | 224         | 0.7         | 2.00E-69  | 43.85%    |
| CqNAC85    | ANAC042/AT2G43000 | 223       | 223         | 0.74        | 5.00E-73  | 66.05%    |
